# Supplementary material for: Fatal Case of Imported Tick-Borne Encephalitis in South Serbia
Source: MDPI journal article supplement (doi:10.3390/tropicalmed7120434), 2022-12-13
Supplement: s1 [file s1]

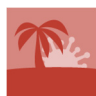

# Supplementary Materials: Microneutralization assay (micro-NT) procedure

Lidija Popović Dragonjić <sup>1,2,\*</sup>, Miodrag Vrbic <sup>1,2</sup>, Aleksandar Tasić <sup>2,3</sup>, Verica Simin <sup>4</sup>, Ivana Bogdan <sup>4</sup>,  
Dragana Mijatović <sup>5,6</sup>, Alejandro Cabezas-Cruz <sup>7</sup> and Pavle Banović <sup>5,8,\*</sup>

<sup>1</sup> Department for Infectious Diseases, Faculty of Medicine, University of Niš, Niš 18000

<sup>2</sup> University Clinical Center, Niš, Niš 18000, Serbia

<sup>3</sup> Department of Radiology, Faculty of Medicine, University of Niš, Niš 18000, Serbia

<sup>4</sup> Department for Microbiology, Pasteur Institute Novi Sad, Novi Sad 21000, Serbia

<sup>5</sup> Ambulance for Lyme Borreliosis and Other Tick-Borne Diseases, Pasteur Institute Novi Sad, Novi Sad 21000, Serbia

<sup>6</sup> Department for Research & Monitoring of Rabies & Other Zoonoses, Pasteur Institute Novi Sad, 21000 Novi Sad, Serbia

<sup>7</sup> ANSES, INRAE, Ecole Nationale Vétérinaire d'Alfort, UMR BIPAR, Laboratoire de Santé Animale, Maisons-Alfort, F-94700, France

<sup>8</sup> Department of Microbiology with Parasitology and Immunology, Faculty of Medicine in Novi Sad, University of Novi Sad, Novi Sad 21000, Serbia

\* Correspondence: lidija\_popovic2003@yahoo.com (L.P.D.); pavle.banovic@mf.uns.ac.rs (P.B.)

TBEV strain Neudörfl (National Collection of Pathogenic Viruses, United Kingdom; Cat. No 0201139v) was cultured in monolayer of BHK-21/C13 (BS CL 8, Istituto Zooprofilattico Sperimentale Brescia, Italy) in BSL2+ laboratory of Pasteur Institute Novi Sad. Virus stocks were prepared in concentration of 100 Tissue Culture Infectious Dose (TCID)/100 µl and stored at -80 °C until further use.

The micro-NT was performed in 96-well cell culture plate (Thermo Scientific™, Massachusetts, United States, Cat. no 130338). After sample inactivation at 56 °C for 30 min, serum and cerebrospinal fluid samples were tested in duplicate, diluted in Glasgow Minimal Essential Medium (Biowest, France; Cat. No P0120) in serial dilutions of 1:5 to 1:640.

In every test run, defined positive and negative control were added together with a cell control and a virus back-titration. A total of 100 TCID of virus stock was added to the respective serum dilutions and incubated for one hour at 37 °C. Subsequently, serum-virus/CSF-virus mixture was transferred to wells with previously seeded BHK21/C13 2x10<sup>4</sup> cells and incubated for five days at 37 °C in atmosphere with 5% CO<sub>2</sub>. For each sample, cytopathic effect (CPE) in both wells was observed (Figure 1). The sample dilution resulting in virus neutralization in 50% of the replicates (NT50) was calculated using the method of Spearman and Karber. Serum/CSF sample with ≥ 1:10 NT50 for neutralization assay was interpreted as a positive result.

**Citation:** Popović Dragonjić, L.; Vrbic, M.; Tasić, A.; Simin, V.; Bogdan, I.; Mijatović, D.; Cabezas-Cruz, A.; Banović, P. Fatal Case of Imported Tick-Borne Encephalitis in South Serbia.

*Trop. Med. Infect. Dis.* **2022**, *7*, x. <https://doi.org/10.3390/xxxxx>

Academic Editor(s): Harunor Rashid

Received: 15 November 2022

Accepted: 9 December 2022

Published: date

**Publisher's Note:** MDPI stays neutral with regard to jurisdictional claims in published maps and institutional affiliations.

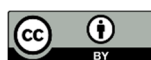

**Copyright:** © 2022 by the authors. Submitted for possible open access publication under the terms and conditions of the Creative Commons Attribution (CC BY) license (<https://creativecommons.org/licenses/by/4.0/>).

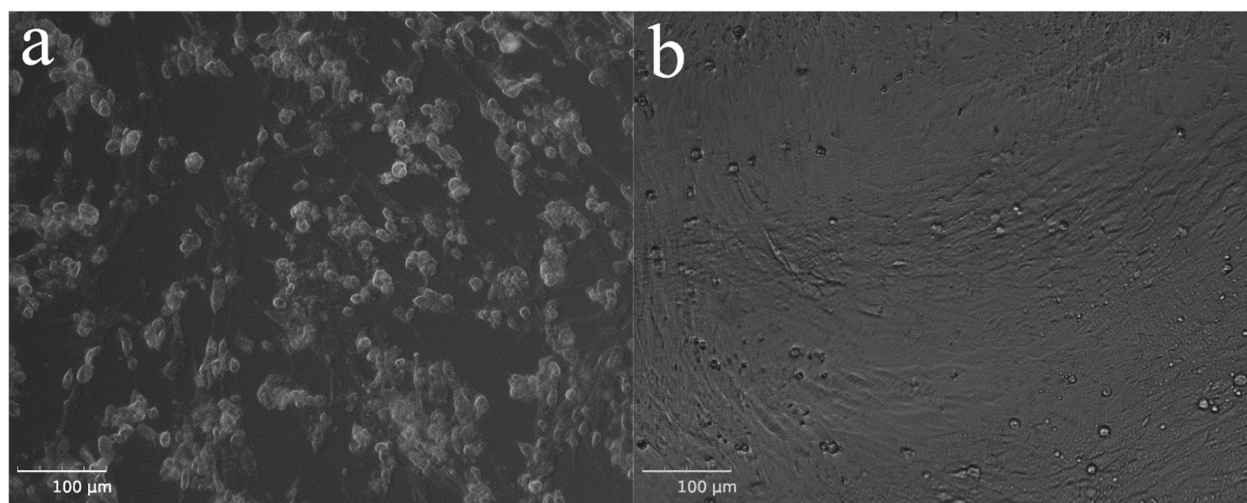

**Figure S1.** Micro-NT assay results. a) CPE detected in BHK-21/C13 cell line infected with TBEV; b) Absence of CPE in BHK-21/C13 cell line monolayer due to virus neutralization.
